# Supplementary material for: Allelic variation of TaWD40-4B.1 contributes to drought tolerance by modulating catalase activity in wheat
Source: PubMed Central journal article supplement (PMC9981739; doi:10.1038/s41467-023-36901-6), 2023-03-02
Supplement: 41467_2023_36901_MOESM1_ESM.pdf [file 41467_2023_36901_MOESM1_ESM.pdf]

**Allelic variation of *TaWD40-4B.1* contributes to drought tolerance by  
modulating catalase activity in wheat**

Tian *et al.*

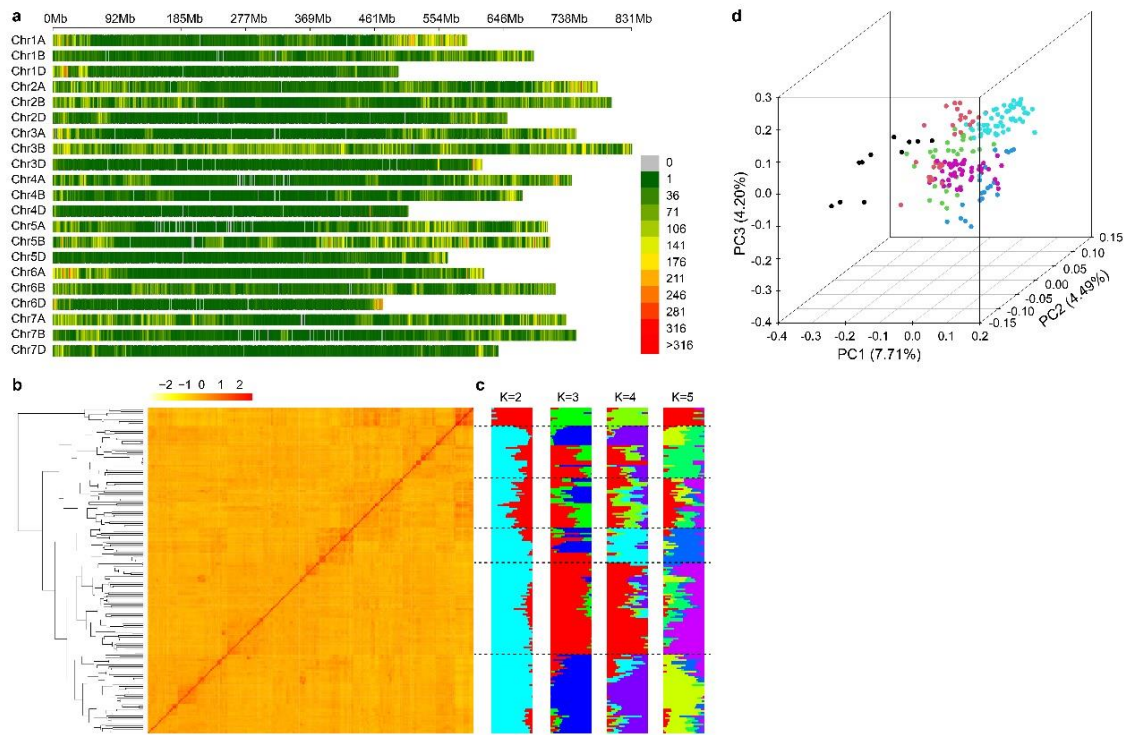

**Supplementary Figure 1. The genetic structure of selected wheat accessions.** **a:** The distribution of filtered SNPs across the wheat genome. **b, c:** Population structure revealed by kinship (**b**) and structure (**c**) analyses. **d:** The scatter plot of the first three principal components. The dots with different colors indicate the groups in panel b.

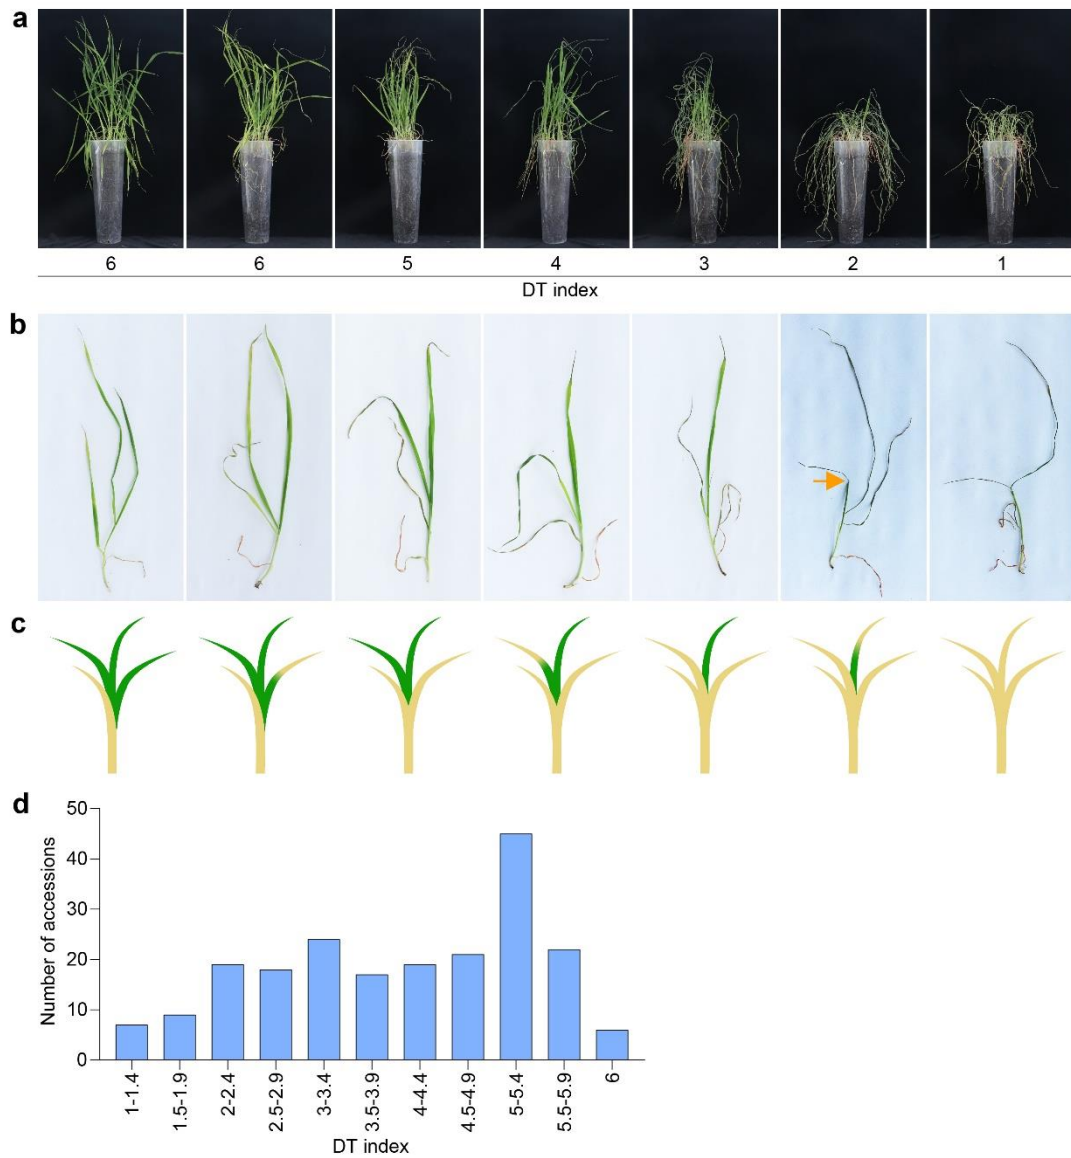

**Supplementary Figure 2. The phenotype assay of the selected wheat accessions. a:** The classification of wilting indices and drought tolerance (DT) indices. **b:** The representative seedlings with different wilting indices and DT indices. **c:** The cartoon diagram shows the seedlings with different wilting indices and DT indices. **d:** The distribution of DT indices of wheat accessions.

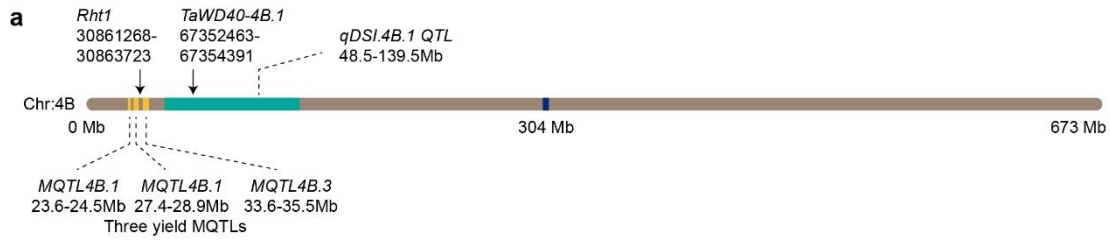

**b**

|             | Trait                                                                                                                      | Population     | Refs |
|-------------|----------------------------------------------------------------------------------------------------------------------------|----------------|------|
| Bread wheat | <i>qDSI.4B.1</i> QTL (including <i>MQTL4B.1</i> ;4B.2;4B.3; <i>Rht1</i> )                                                  | NILs           | 1    |
|             | Leaf dry biomass                                                                                                           | GWAS           | 2    |
|             | Plant height (18.24–21.59 cM), RDM (21.59–29.11 cM)                                                                        | DH population  | 3    |
|             | Grain yield, TGW                                                                                                           | Meta-QTL       | 4    |
|             | Plant height                                                                                                               | RIL population | 5    |
|             | Days to anthesis, Days to maturity                                                                                         | DH population  | 6    |
|             | Leaf length, Shoot length                                                                                                  | RIL population | 7    |
|             | Plant height, Shoot biomass, Grain yield, Harvest index, Maximum root length, Total root biomass, Root biomass up to 30 cm | RIL population | 8    |
|             | TGW (locus 4B-b)                                                                                                           | RIL population | 9    |
|             | Yield ( <i>MQTL1.4</i> , <400 kb)                                                                                          | Meta-QTL       | 10   |
|             | TGW, Yield, Plant height (locus 4B-b)                                                                                      | RIL population | 11   |
|             | Yield, Plant height (locus 4B-b)                                                                                           | RIL population | 12   |
| Durum wheat | Canopy temperature depression, Water index, Quantum yield                                                                  | RIL population | 13   |
|             | <i>MQTL17</i> , etc                                                                                                        | Meta-QTL       | 14   |
|             | Plant height                                                                                                               | GWAS           | 15   |
|             | Plant height, TGW, Stress tolerance                                                                                        | GWAS           | 16   |
|             | Drought index                                                                                                              | GWAS           | 17   |
|             | Root related traits, Yellow pigment content                                                                                | Meta-QTL       | 18   |

**Supplementary Figure 3. The drought tolerant QTL *qDSI-4B.1* in the short arm of chromosome 4B of hexaploid bread wheat and tetraploid durum wheat reported in the past fifteen years. a: The diagram of *qDSI-4B.1* and adjacent loci and genes associated with yield and plant height. b: The references that reported locus *qDSI-4B.1*.**

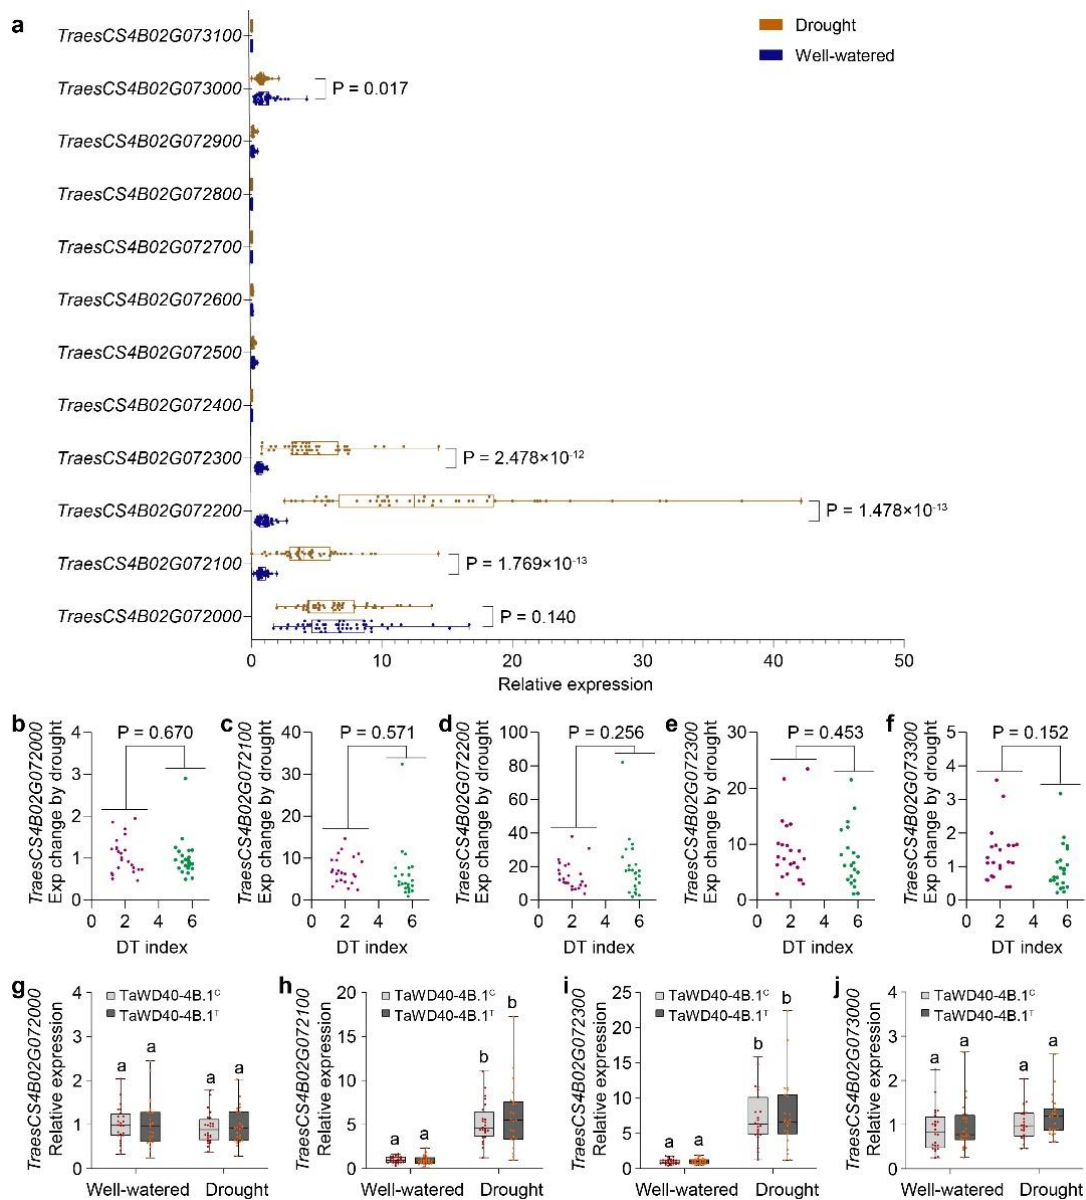

**Supplementary Figure 4. The expression of twelve genes in the LD block of chromosome 4B.** **a:** The relative expression levels of 48 selected accessions under well-watered and water-withheld conditions. The difference between well-watered and water-withheld conditions was calculated with a paired two-sided two-sample *t*-test ( $n = 48$  wheat accessions;  $P = 0.140, 1.77 \times 10^{-13}, 1.48 \times 10^{-13}, 2.48 \times 10^{-12}, 0.154, 2.61 \times 10^{-4}, 0.018, 0.529$  and  $0.017$  from *TraesCS4B02G072000* to *TraesCS4B02G073000* expect for *TraesCS4B02G072700*, *TraesCS4B02G072800* and *TraesCS4B02G073100*). **b-f:** The comparison of expression alteration folds by drought between accessions with low and high DT indices. The difference was calculated via the independent two-sample two-sided *t*-test ( $n = 24$  wheat accessions;  $P = 0.670, 0.571, 0.256, 0.453$  and  $0.152$  respectively). **g-j:** The relative expression of genes in the accessions harboring *TaWD40-4B.1<sup>C</sup>* and *TaWD40-4B.1<sup>T</sup>* under well-watered and water-withheld conditions ( $n = 24$  wheat accessions;  $P = 0.840, 4.19 \times 10^{-14}, 4.87 \times 10^{-13}$  and  $0.327$  respectively). The significance of the difference is calculated with a one-way ANOVA analysis – Tukey comparison and the columns labeled without the same alphabet are significantly different ( $P < 0.05$ , two-sided). In **a, g-j:** box indicates the range from lower to upper quartiles, and bar ranges the minimum to maximum observations. Source data are provided as a Source Data file.

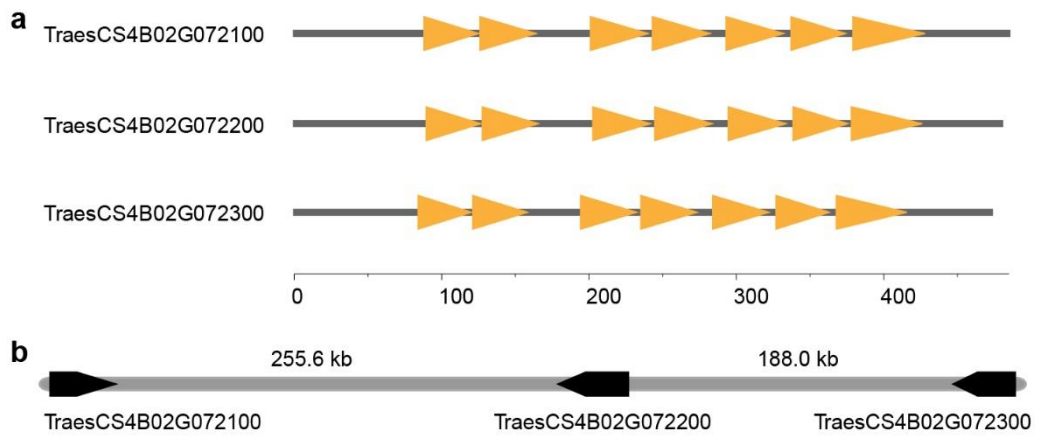

**Supplementary Figure 5. The domain analysis of TaWD40-4B.1 and its paralogues.**  
**a:** The WD40 domain analysis. **b:** The position of *TaWD40-4B.1* and its paralogues on chromosome 4B.

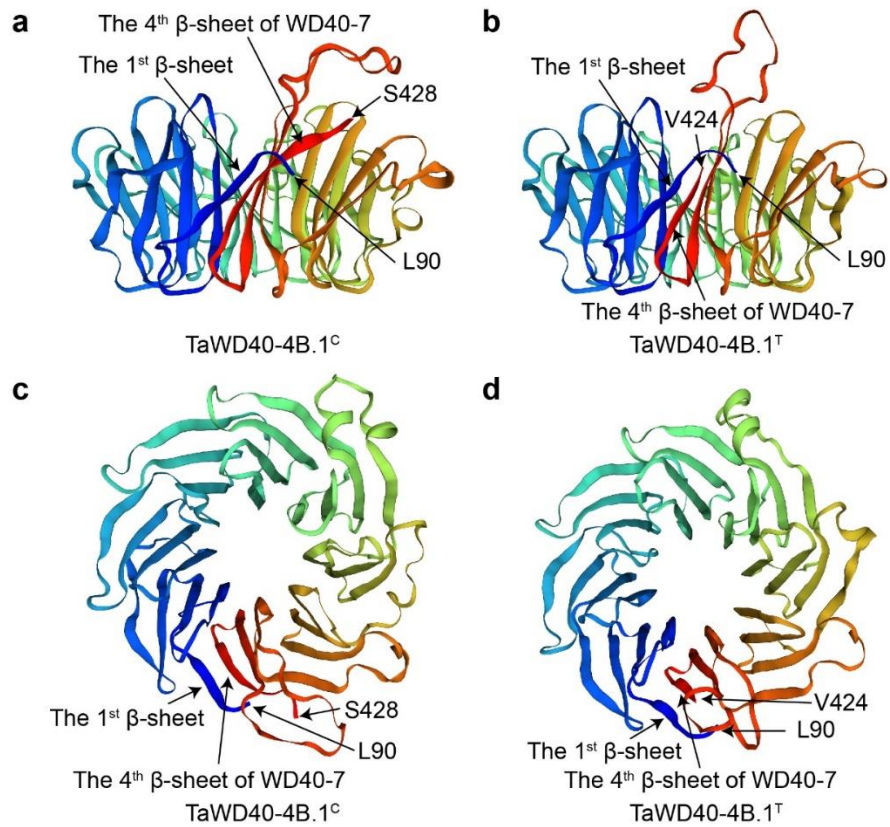

**Supplementary Figure 6. The 3D structure of TaWD40-4B.1 predicted with SWISS-MODEL (<https://swissmodel.expasy.org/>). a, c: The structure of TaWD40-4B.1<sup>C</sup>. b, d: The structure of TaWD40-4B.1<sup>T</sup>.**

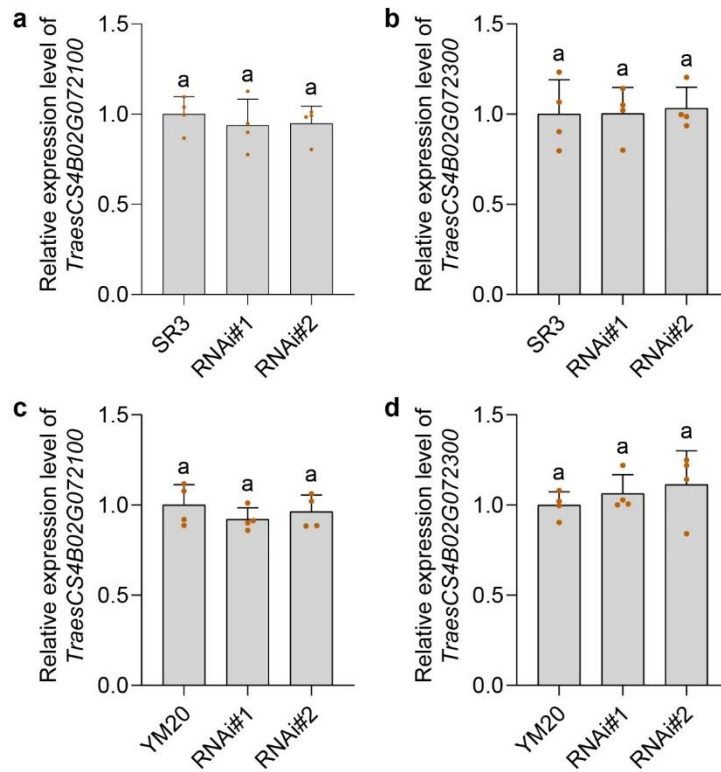

**Supplementary Figure 7. The expression of two paralogs of *TaWD40-4B.1* in the *TaWD40-4B.1* RNAi lines.** Data are shown as mean and standard deviation. The significance of the difference is calculated with a one-way ANOVA analysis – Tukey comparison and the columns labeled without the same alphabet are significantly different ( $P < 0.05$ , two-sided) ( $n = 4$  biologically independent samples;  $P = 0.728, 0.952, 0.504$  and  $0.501$  respectively in panels a-d). SR3 and YM20: two cultivars carrying *TaWD40-4B.1<sup>C</sup>* and *TaWD40-4B.1<sup>T</sup>* respectively; RNAi: *TaWD40-4B.1<sup>C</sup>* / *TaWD40-4B.1<sup>T</sup>* RNAi lines. Source data are provided as a Source Data file.



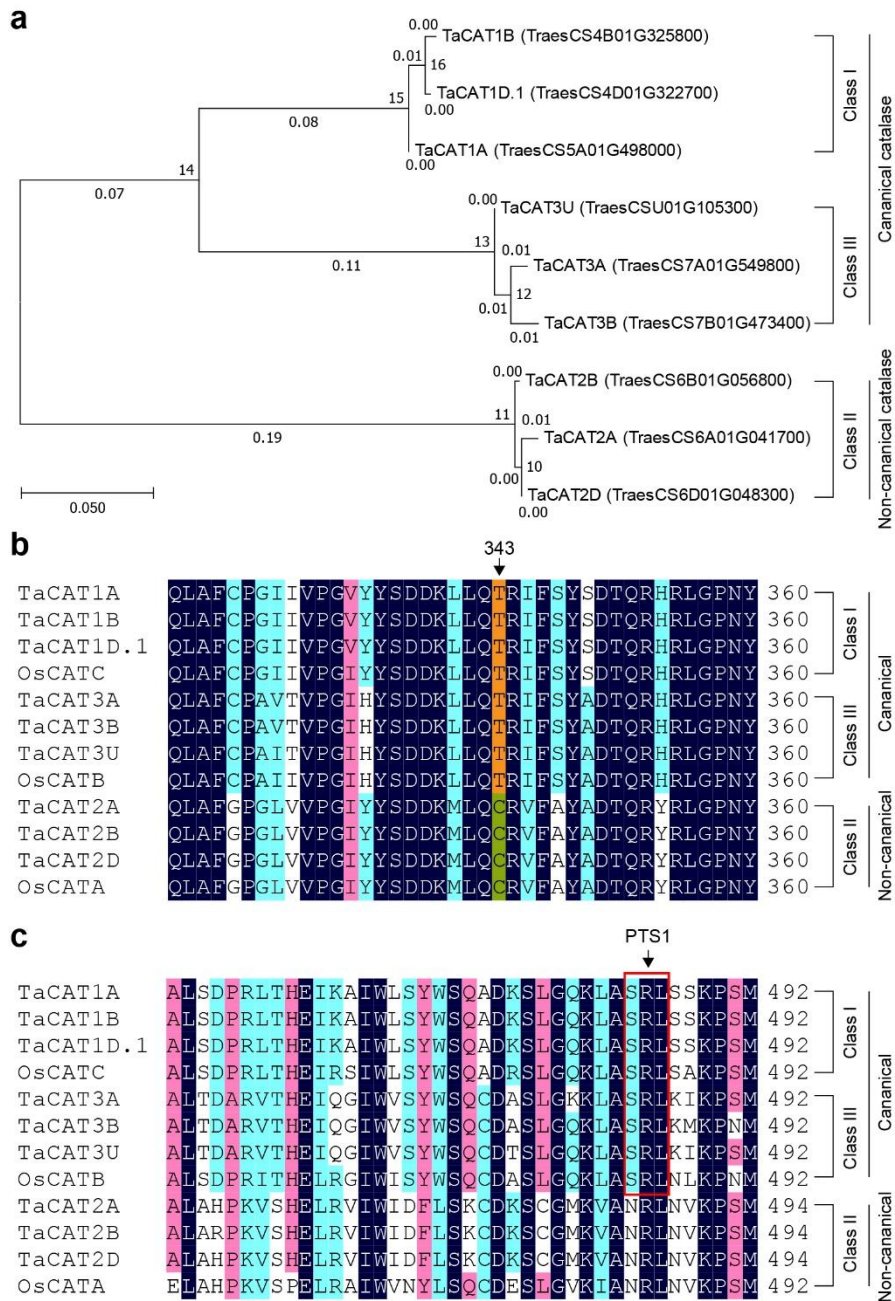

**Supplementary Figure 8. The phylogenetic and sequence analysis of TaCATs.**

**a:** The phylogenetic tree of TaCATs with the Neighbor-Joining method. **b:** The sequence alignment of wheat and rice catalase fragments containing the amino acid residue 343 that characterizes canonical and non-canonical catalase. **c:** The sequence alignment of wheat and rice catalase fragments containing the peroxisome targeting sequence at C-terminus.

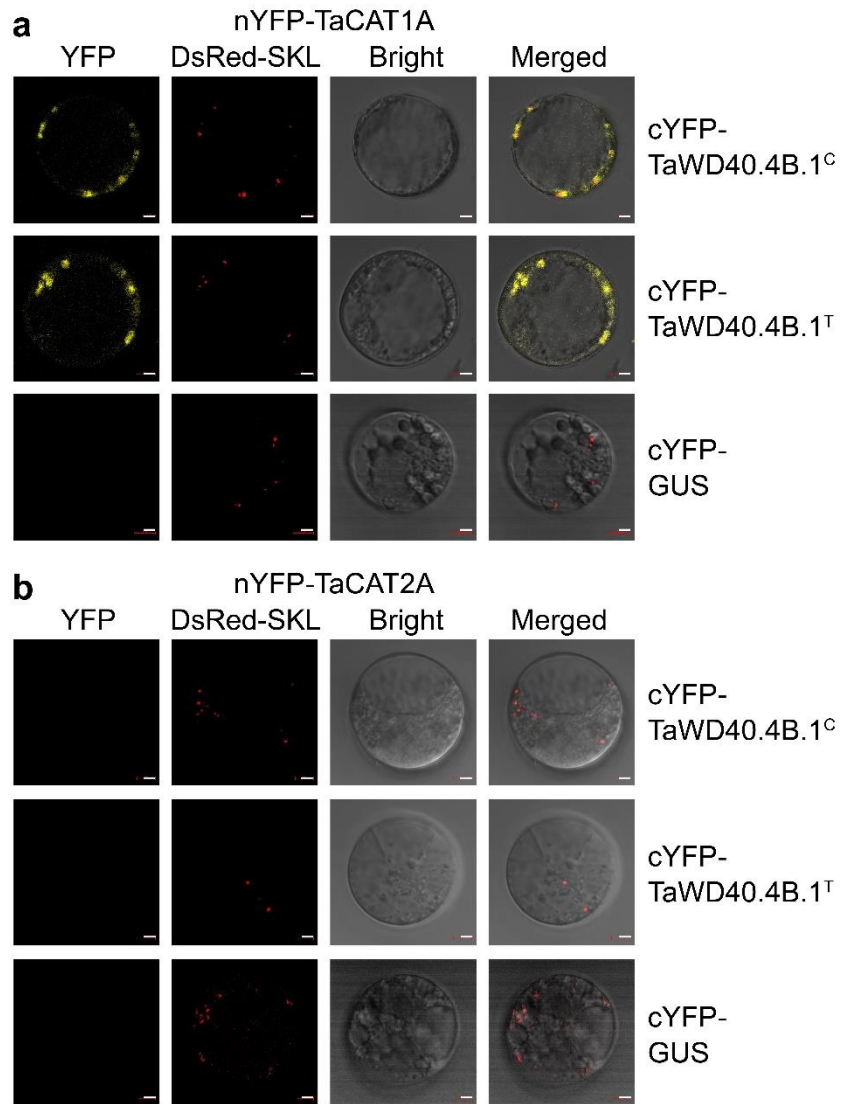

**Supplementary Figure 9. The interaction of TaWD40-4B.1<sup>C</sup> / TaWD40-4B.1<sup>T</sup> and TaCAT1A / TaCAT2A.** **a, b:** The bimolecular fluorescence complementation assay confirms the interaction between TaWD40-4B.1<sup>C</sup> / TaWD40-4B.1<sup>T</sup> and TaCAT1A / 2A. DsRed-SKL is the DsRed fused with peroxisome targeting sequence SKL serving as the peroxisome marker. Bar = 5  $\mu$ m.

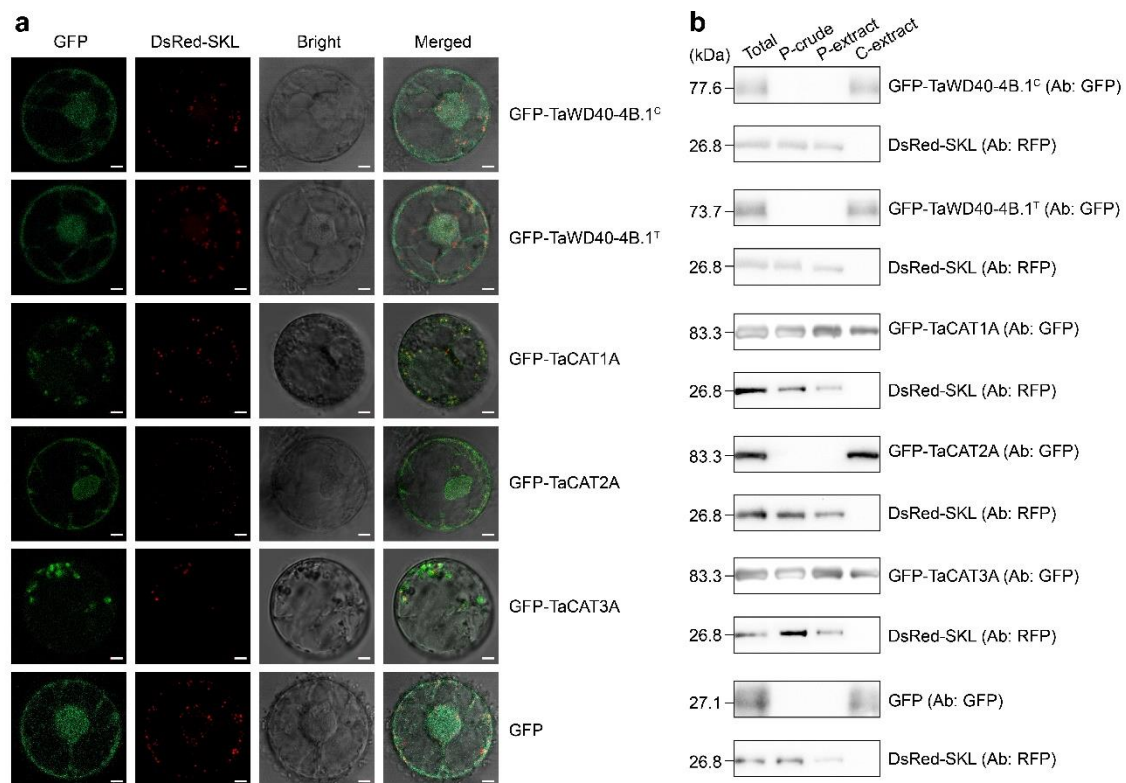

**Supplementary Figure 10. The subcellular localization of TaWD40-4B.1<sup>C</sup> / TaWD40-4B.1<sup>T</sup> and TaCATs.** **a:** Transient co-expression of GFP fused TaWD40-4B.1<sup>C</sup>, TaWD40-4B.1<sup>T</sup> or TaCATs with the peroxisome marker DsRed-SKL. **b:** The western blotting assay using the total, peroxisomal and cytosol proteins extracted from the protoplasts. Total, total proteins; P-crude: crude peroxisomal extracts; P-extract: peroxisomal extracts; C-extract: cytosol proteins. Source data are provided as a Source Data file.

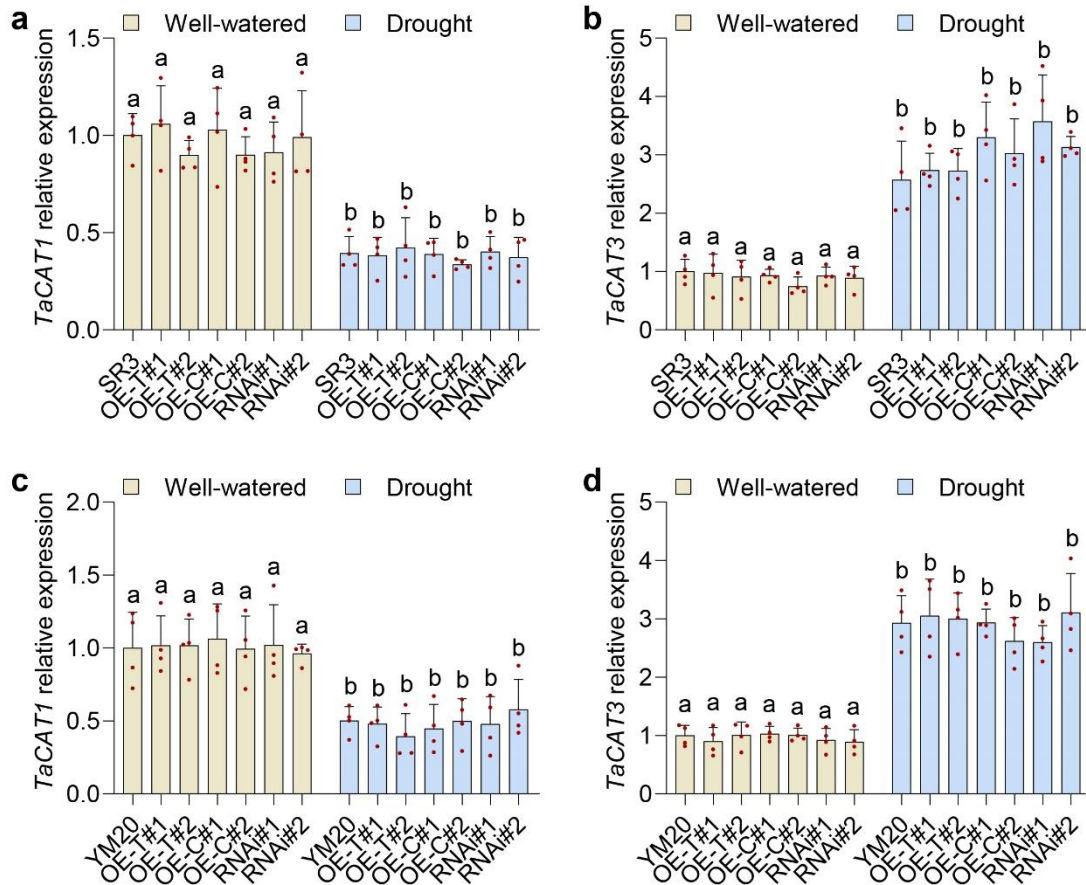

**Supplementary Figure 11. *TaWD40-4B.1<sup>C</sup>* and *TaWD40-4B.1<sup>T</sup>* do not affect the expression of catalase genes.** Data are shown as mean and standard deviation. The significance of the difference is calculated with a one-way ANOVA analysis – Tukey comparison and the columns labeled without the same alphabet are significantly different ( $P < 0.05$ , two-sided) ( $n = 4$  biologically independent samples;  $P = 4.15 \times 10^{-14}$ ,  $7.32 \times 10^{-17}$ ,  $4.01 \times 10^{-8}$  and  $1.87 \times 10^{-18}$  respectively in panels a-d). Source data are provided as a Source Data file.

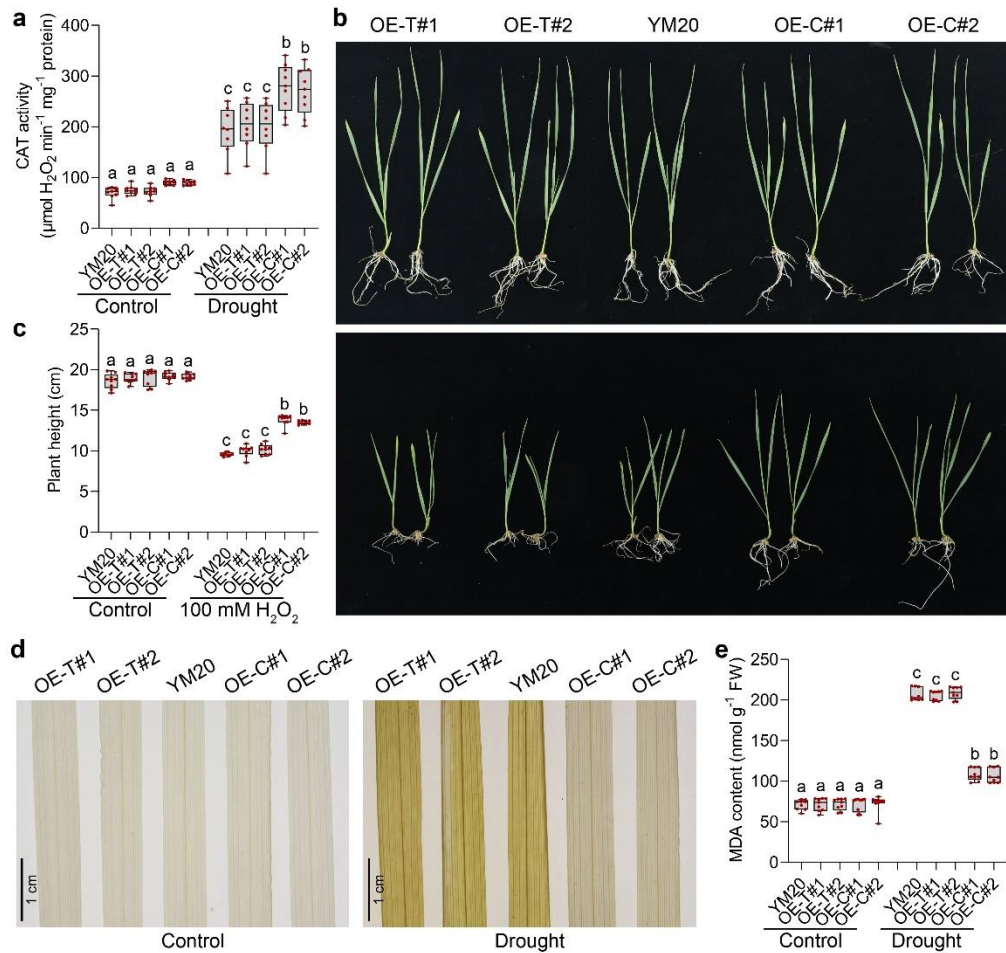

**Supplementary Figure 12. *TaWD40-4B.1<sup>C</sup>* but not *TaWD40-4B.1<sup>T</sup>* enhances tolerance to oxidative stress and reduces H<sub>2</sub>O<sub>2</sub> level under drought in YM20. **a:** The catalase activities in leaves of YM20 and its transgenic lines under the well-watered and water-withheld conditions ( $n = 9$  biologically independent samples;  $P = 1.19 \times 10^{-30}$ ). **b:** The assessment of the oxidative stress tolerance of SR3 and its transgenic lines. **c:** The statistical result of plant height in panel **b** ( $n = 9$  biologically independent samples;  $P = 4.62 \times 10^{-63}$ ). **d:** the H<sub>2</sub>O<sub>2</sub> levels revealed by DAB staining indicates in the leaves of wheat seedlings under the well-watered and water-withheld conditions. **e:** The MDA contents in the leaves of wheat seedlings under the well-watered and water-withheld conditions ( $n = 9$  biologically independent samples;  $P = 8.03 \times 10^{-69}$ ). In **a**, **c** and **e**, box indicates the range from lower to upper quartiles, and bar ranges the minimum to maximum observations; the significance of the difference is calculated with a one-way ANOVA analysis – Tukey comparison and the columns labeled without the same alphabet are significantly different ( $P < 0.05$ , two-sided). YM20: the cultivar carrying *TaWD40-4B.1<sup>T</sup>*; OE-T: *TaWD40-4B.1<sup>T</sup>* overexpression lines; OE-C: *TaWD40-4B.1<sup>C</sup>* overexpression lines. Source data are provided as a Source Data file.**

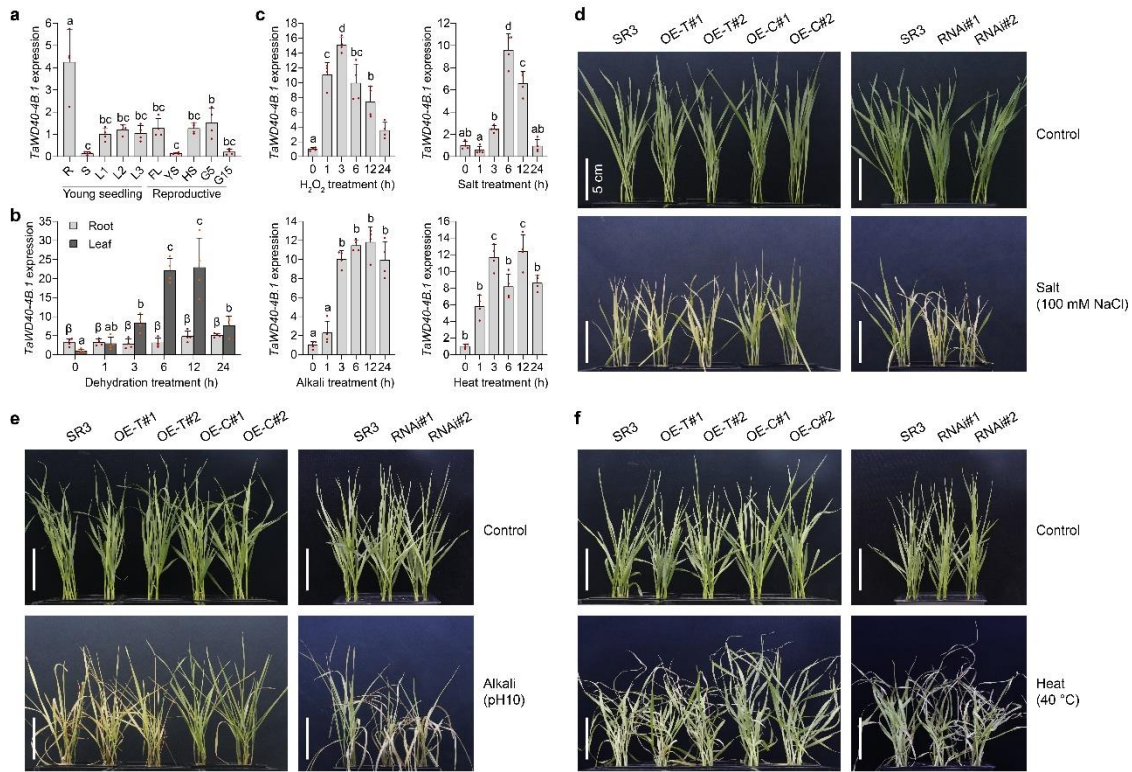

**Supplementary Figure 13. *TaWD40-4B.1<sup>C</sup>* enhances the tolerance to salt, alkali and heat stress.** **a:** The expression of *TaWD40-4B.1<sup>C</sup>* in different tissues at the three-leaf and reproductive stages ( $n = 4$  biologically independent samples;  $P = 6.75 \times 10^{-10}$ ). R, S, L1, L2 and L3: roots, stems, the first, second and third leaves of SR3 seedlings at three-leaf stage; FL, flag leaves at heading stage; YS, young spikes at early booting stage; HS, spikes at heading stage; G5 and G15, the grains of 5 and 15 days of post anthesis, respectively. **b:** The transcriptional profiles of *TaWD40-4B.1* in the leaves and roots of SR3 seedlings under dehydration ( $n = 4$  biologically independent samples;  $P = 0.033$  in roots and  $1.31 \times 10^{-7}$  in leaves). **c:** The expression of *TaWD40-4B.1<sup>C</sup>* in the leaves of SR3 seedlings treated with  $H_2O_2$ , salt, alkali and heat ( $n = 4$  biologically independent samples;  $P = 4.07 \times 10^{-9}$ ,  $7.57 \times 10^{-12}$ ,  $1.17 \times 10^{-10}$  and  $7.08 \times 10^{-9}$  respectively). 0~24: the time of treatment. **d-f:** The phenotypes under salt (**d**), alkali (**e**) and heat (**f**) stresses. Bar: 5 cm. In **a-c**, data are shown as mean and standard deviation; the significance of the difference is calculated with a one-way ANOVA analysis – Tukey comparison and the columns labeled without the same alphabet are significantly different ( $P < 0.05$ , two-sided). SR3: the cultivar carrying *TaWD40-4B.1<sup>C</sup>*; OE-T: *TaWD40-4B.1<sup>T</sup>* overexpression lines; OE-C: *TaWD40-4B.1<sup>C</sup>* overexpression lines; RNAi: *TaWD40-4B.1<sup>C</sup>* RNAi lines. Source data are provided as a Source Data file.

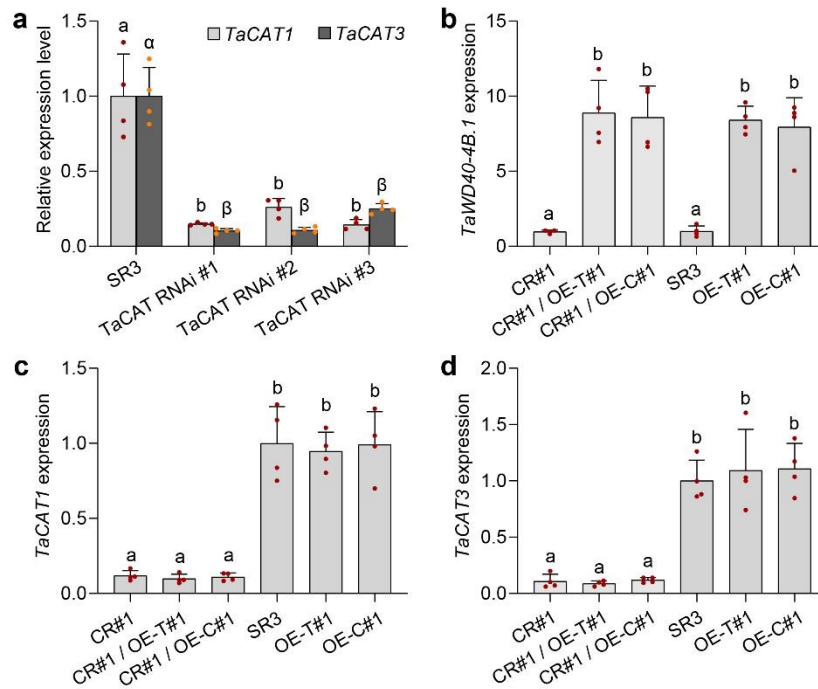

**Supplementary Figure 14. The expression of catalase genes and *TaWD40-4B.1* in the *TaCAT* RNAi lines and *TaCAT* RNAi / *TaWD40-4B.1* overexpression lines.** **a:** The expression of canonical catalase genes *TaCAT1* and *TaCAT3* in the *TaCAT* RNAi lines (n = 4 biologically independent samples;  $P = 4.70 \times 10^{-6}$  for *TaCAT1* and  $4.01 \times 10^{-8}$  for *TaCAT3*). **b-d:** The expression of *TaWD40-4B.1*, *TaCAT1* and *TaCAT3* in the cross lines (n = 4 biologically independent samples;  $P = 1.27 \times 10^{-7}$ ,  $2.27 \times 10^{-9}$  and  $3.71 \times 10^{-8}$  in panels b-d). Data are shown as mean and standard deviation. The significance of the difference is calculated with a one-way ANOVA analysis – Tukey comparison and the columns labeled without the same alphabet are significantly different ( $P < 0.05$ , two-sided). RNAi#1-3: three *TaCAT* RNAi lines of SR3 carrying *TaWD40-4B.1<sup>C</sup>*; OE-C#1: *TaWD40-4B.1<sup>C</sup>* overexpression line; OE-T#1: *TaWD40-4B.1<sup>T</sup>* overexpression line; CR#1 / OE-T#1: *TaCAT* RNAi / *TaWD40-4B.1<sup>T</sup>* overexpression cross line; CR#1 / OE-C#1: *TaCAT* RNAi / *TaWD40-4B.1<sup>C</sup>* overexpression cross line. Source data are provided as a Source Data file.

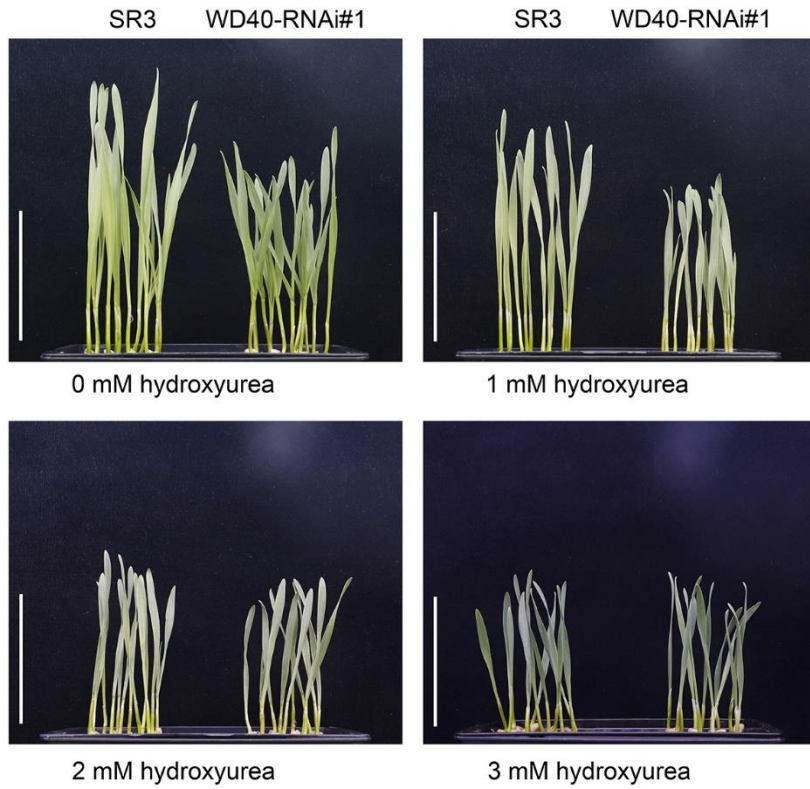

**Supplementary Figure 15. The effect of on the growth of wheat seedlings under high light intensity.** Bar = 5 cm. SR3: the cultivar carrying *TaWD40-4B.1<sup>C</sup>*; WD40-RNAi#1: *TaWD40-4B.1<sup>C</sup>* RNAi line.



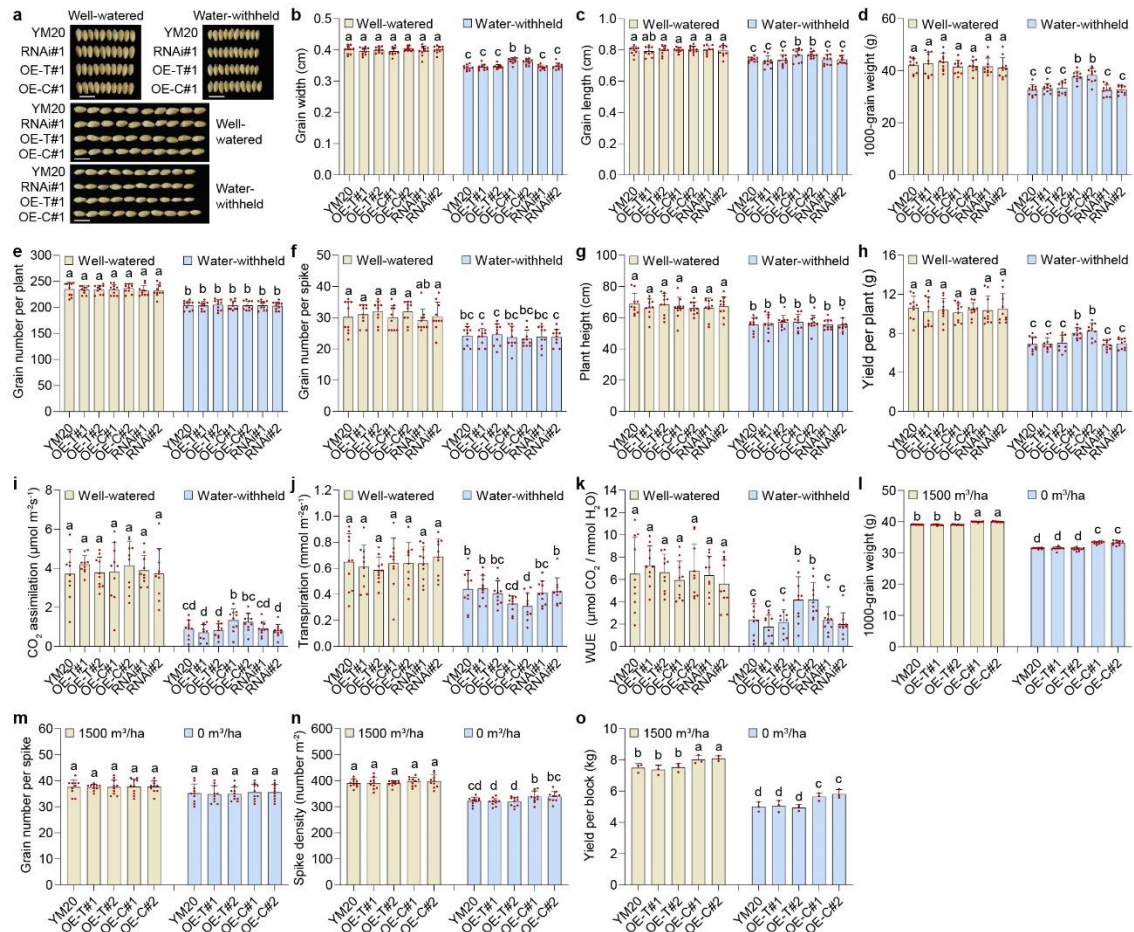

**Supplementary Figure 16. *TaWD40-4B.1C* enhances grain yields of YM20 in water-withheld condition.** **a:** The grain sizes of SR3 and its transgenic lines under the well-watered and water-withheld conditions. **b, c:** The statistical comparison of grain width (b) and length (c) of panel a (n = 10 biologically independent samples;  $P = 1.41 \times 10^{-48}$  and  $4.93 \times 10^{-15}$  respectively). **d:** The 1000-grain weights under the well-watered and water-withheld conditions (n = 10 biologically independent samples;  $P = 1.16 \times 10^{-28}$ ). **e-g:** The grain number per plant (e), grain number per spike (f), and plant height (g) under the well-watered and water-withheld conditions (n = 10 biologically independent samples;  $P = 3.09 \times 10^{-31}$ ,  $1.34 \times 10^{-14}$  and  $1.15 \times 10^{-14}$  respectively in panels e-g). **h:** The grain yield of plants under the well-watered and water-withheld conditions (n = 10 biologically independent samples;  $P = 2.36 \times 10^{-30}$ ). **i-k:** The CO<sub>2</sub> assimilation (i), transpiration rate (j) and water use efficiency (k) under the well-watered and water-withheld conditions (n = 10 biologically independent samples;  $P = 6.65 \times 10^{-35}$ ,  $2.11 \times 10^{-13}$  and  $1.12 \times 10^{-17}$  respectively in panels i-k). **l-o:** 1000-grain weights (l), spike numbers per spike (m), spike densities (n) and grain yields (o) in the field trail (n = 10 for panels l-n and 3 for panel o (biologically independent samples);  $P = 1.15 \times 10^{-89}$ , 0.051,  $2.37 \times 10^{-26}$  and  $4.92 \times 10^{-13}$  respectively in panels l-o). In **b-o**, data are shown as mean and standard deviation; the significance of the difference is calculated with a one-way ANOVA analysis – Tukey comparison and the columns labeled without the same alphabet are significantly different ( $P < 0.05$ , two-sided). YM20: the cultivar carrying *TaWD40-4B.1<sup>T</sup>*; OE-T: *TaWD40-4B.1<sup>T</sup>* overexpression lines; OE-C: *TaWD40-4B.1<sup>C</sup>* overexpression lines; RNAi: *TaWD40-4B.1<sup>T</sup>* RNAi lines. Source data are provided as a Source Data file.

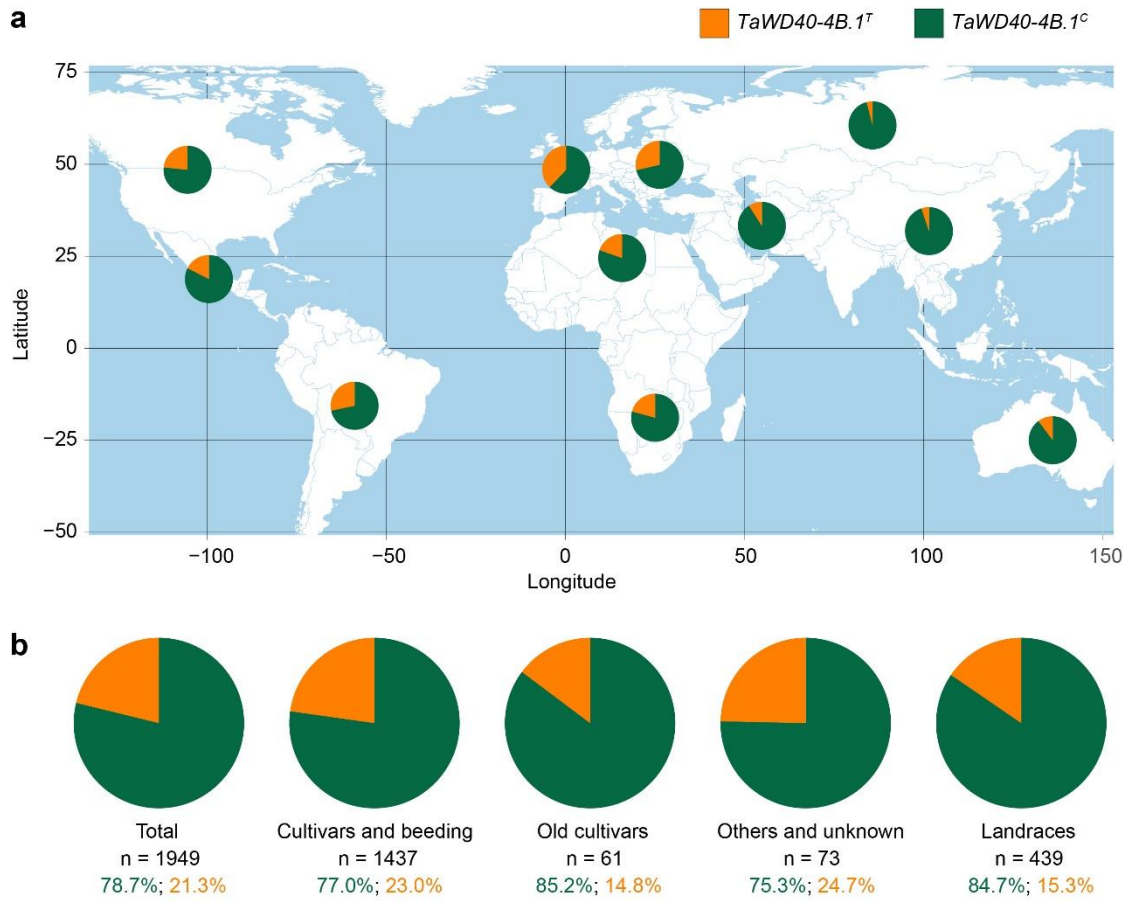

**Supplementary Figure 17. The distribution and proportion of accessions carrying *TaWD40-4B.1<sup>C</sup>* and *TaWD40-4B.1<sup>T</sup>* around the world. a: The distribution of *TaWD40-4B.1<sup>C</sup>* and *TaWD40-4B.1<sup>T</sup>*. b. The proportions of *TaWD40-4B.1<sup>C</sup>* and *TaWD40-4B.1<sup>T</sup>* in 1861 wheat accessions.**

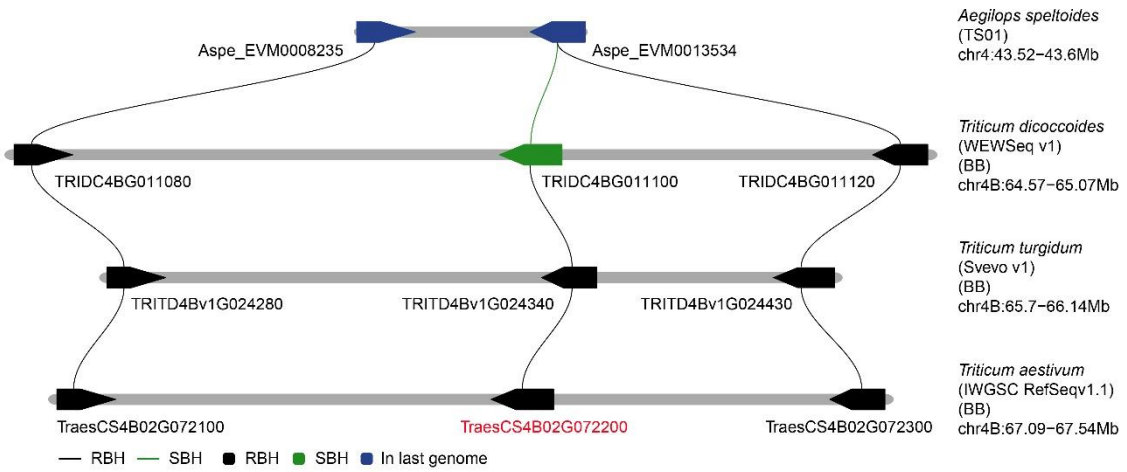

**Supplementary Figure 18. The collinearity analysis of *TaWD40-4B.1* and its paralogues and homologues.** The genes of hexaploid and tetraploid wheat and diploid progenitor close species *Aegilops speltoides* were used for analysis.

## Supplementary references

- 1 Nouraei, S., Mia, M. S., Liu, H., Turner, N. C. & Yan, G. Transcriptome analyses of near isogenic lines reveal putative drought tolerance controlling genes in wheat. *Front Plant Sci* **13**, 857829 (2022).
- 2 Siddiqui, M. N. *et al.* New drought-adaptive loci underlying candidate genes on wheat chromosome 4B with improved photosynthesis and yield responses. *Physiol Plant* **173**, 2166–2180 (2021).
- 3 Nagy, É. *et al.* Detection of drought tolerance-related QTL in the Plainsman V./Cappelle Desprez doubled haploid wheat population. *Cereal Res Commun* **50**, 689–698 (2022).
- 4 Liu, H. *et al.* Major genomic regions responsible for wheat yield and its components as revealed by meta-QTL and genotype–phenotype association analyses. *Planta* **252**, 65 (2020).
- 5 Puttamadanayaka, S. *et al.* Mapping genomic regions of moisture deficit stress tolerance using backcross inbred lines in wheat (*Triticum aestivum* L.). *Sci Rep* **10**, 21646 (2020).
- 6 Gahlaut, V. *et al.* QTL mapping for nine drought-responsive agronomic traits in bread wheat under irrigated and rain-fed environments. *PLoS One* **12**, e0182857 (2017).
- 7 Zhang, H. *et al.* Conditional and unconditional QTL mapping of drought-tolerance-related traits of wheat seedling using two related RIL populations. *J Genet* **92**, 213-231 (2013).
- 8 Kadam, S. *et al.* Genomic associations for drought tolerance on the short arm of wheat chromosome 4B. *Funct Integr Genomics* **12**, 447-464 (2012).
- 9 Nezhad, K. Z. *et al.* QTL analysis for thousand-grain weight under terminal drought stress in bread wheat (*Triticum aestivum* L.). *Euphytica* **186**, 127-138 (2012).
- 10 Swamy, B. M., Vikram, P., Dixit, S., Ahmed, H. & Kumar, A. Meta-analysis of grain yield QTL identified during agricultural drought in grasses showed consensus. *BMC Genomics* **12**, 319 (2011).
- 11 Pinto, R. S. *et al.* Heat and drought adaptive QTL in a wheat population designed to minimize confounding agronomic effects. *Theor Appl Genet* **121**, 1001-1021 (2010).
- 12 Mathews, K. L. *et al.* Multi-environment QTL mixed models for drought stress adaptation in wheat. *Theor Appl Genet* **117**, 1077-1091 (2008).
- 13 Diab, A. A. *et al.* Drought - inducible genes and differentially expressed sequence tags associated with components of drought tolerance in durum wheat. *Sci Res Essay* **3**, 9-26 (2008).
- 14 Iannucci, A. *et al.* Mapping QTL for root and shoot morphological traits in a durum wheat  $\times$  *T. dicoccum* segregating population at seedling stage. *Int J Genomics* **2017**, 6876393 (2017).
- 15 Soriano, J. M., Malosetti, M., Roselló, M., Sorrells, M. E. & Royo, C. Dissecting the old Mediterranean durum wheat genetic architecture for phenology, biomass and yield formation by association mapping and QTL meta-analysis. *PLoS One*

- 12**, e0178290 (2017).
- 16 Sukumaran, S., Reynolds, M. P. & Sansaloni, C. Genome-wide association analyses identify QTL hotspots for yield and component traits in durum wheat grown under yield potential, drought, and heat stress environments. *Front Plant Sci* **9** (2018).
  - 17 Wang, S. *et al.* A Genome-wide association study of highly heritable agronomic traits in durum wheat. *Front Plant Sci* **10**, 919 (2019).
  - 18 Soriano, J. M., Colasuonno, P., Marcotuli, I. & Gadaleta, A. Meta-QTL analysis and identification of candidate genes for quality, abiotic and biotic stress in durum wheat. *Sci Rep* **11**, 11877 (2021).
